# Supplementary material for: Yak rumen microbial diversity at different forage growth stages of an alpine meadow on the Qinghai-Tibet Plateau
Source: PeerJ. 2019 Sep 19;7:e7645. doi: 10.7717/peerj.7645 (PMC6754979; doi:10.7717/peerj.7645)
Supplement: Table S1 — The above-ground biomass (g/m2) was collected and weighed according to the classification of herbage species in REGY, GY and WGY, the proportions of dominant species (%) indicated that species above-ground / total biomass of each period. [file peerj-07-7645-s009.xlsx]

## Sheet: Table S1
Table S1 The dominant species of alpine meadow in QTP at different forage growth stage
Grass stage	Species
	The dominant species	Above-groung biobass (g /m2)	The proportions of dominant species (%)
REGY	Gramineae	20.35	40.9
	Gyperaceae	17.91	36
	Potentilla	1.02	2.04
	Other	10.48	23.09
	Total	49.76
GY	Elymus mulans	109.19	74.5
	Poa pratensi	2.93	2
	Kobresia humili	9.97	6.8
	Potentil abifura	4.98	3.4
	Saucssurea pulchra	3.96	2.7
	Ajania tenuifolia	2.05	1.4
	Other	13.48	9.19
	Total	146.56
WGY	Elymus mulans	79.27	78.56
	Total	100.9
