# Supplementary material for: Yak rumen microbial diversity at different forage growth stages of an alpine meadow on the Qinghai-Tibet Plateau
Source: PeerJ. 2019 Sep 19;7:e7645. doi: 10.7717/peerj.7645 (PMC6754979; doi:10.7717/peerj.7645)
Supplement: Table S2 — We identified OTUs unique to different grass growth stage and shared among all three stages. A, B, C refers to the OUT unique in WGY, GY and REGY respectively. D refers to the OUT shared in WGY, GY and REG. E refers to the OUT shared between WGY and GY. F refers to the OUT shared between WGY and REGY. G refers to the OUT shared between REGY and GY. ND means no data. [file peerj-07-7645-s010.xlsx]

## Sheet: Table S2
Table S2 Venn diagram showing OUT shared or unique to each other in REGY, GY, and WGY
phylum	D	A	B	C	E	F	G
Bacteroidetes	23.5617	2.59789	2.54518	3.23042	3.76506	4.87199	4.79669
Firmicutes	17.8991	1.19729	1.49849	1.4759	2.3494	3.29066	3.17018
Verrucomicrobia	3.28313	0.331325	0.105422	0.301205	0.353916	1.08434	0.414157
Proteobacteria	2.43976	0.436747	0.00753012	0.414157	0.286145	0.692771	0.527108
Spirochaetae	1.40813	0.218373	0.105422	0.0753012	0.188253	0.263554	0.210843
Actinobacteria	0.218373	0.105422	0.143072	0.0828313	0.120482	0.0978916	0.0903614
Cyanobacteria	0.63253	ND	0.0753012	0.11	0.0828313	ND	0.060241
Lentisphaerae	0.0225904	0.165663	0.0225904	0.0150602	0.0903614	0.256024	0.0150602
Tenericutes	1.3	0.128012	0.225904	0.105422	ND	0.368976	0.210843
Fibrobacteres	0.323795	0.0225904	0.0225904	0.0225904	0.0376506	0.0753012	0.0225904
Fusobacteria	0.519578	ND	ND	ND	0.0225904	ND	ND
Saccharibacteria	0.368976	0.105422	0.00753012	0.0451807	0.0225904	0.0451807	0.0527108
SR1	0.256024	ND	0.0225904	0.0225904	0.0150602	0.0451807	0.0376506
Synergistetes	0.173193	0.00753012	ND	0.0527108	0.0150602	0.0301205	0.0225904
Planctomycetes	0.203313	0.060241	0.391566	0.0527108	0.0527108	0.060241	0.0451807
Elusimicrobia	0.105422	0.0150602	0.0225904	0.0376506	0.0301205	0.0376506	ND
Euryarchaeota	0.105422	0.0150602	0.00753012	0.0150602	0.0150602	0.0451807	0.0150602
Armatimonadetes	0.0376506	0.0301205	ND	0.0376506	0.0376506	0.0376506	ND
Gracilibacteria	0.0301205	ND	ND	ND	ND	ND	ND
Chlorobi	0.00753012	ND	ND	ND	ND	ND	ND
Chloroflexi	ND	0.00753012	0.0301205	0.0150602	0.0301205	0.0451807	ND
Acidobacteria	ND	0.0451807	ND	0.0301205	0.0677711	0.0376506	0.0225904
WA-aaa01f12	0.0150602	ND	ND	ND	0.00753012	ND	ND
WS6	0.0150602	ND	ND	0.0150602	ND	ND	ND
Gemmatimonadetes	ND	0.0225904	0.0150602	0.0301205	ND	0.0301205	ND
Parcubacteria	ND	ND	ND	ND	ND	0.0527108	ND
Deferribacteres	ND	ND	0.0225904	ND	ND	ND	0.0150602
Deinococcus-Thermus	ND	ND	0.0225904	ND	ND	ND	ND
Gracilibacteria	ND	ND	ND	ND	ND	ND	0.0150602
Microgenomates	ND	ND	ND	0.0225904	ND	ND	ND
FBP	ND	0.00753012	ND	ND	ND	ND	ND
Note: A,B,C refers to the OUT unique in WGY, GY and REGY respectively.D refers to the OUT shared in WGY, GY and REGY. E refers to the OUT shared between WGY and GY; F refers to the OUT shared between WGY and REGY; G refers to the OUT shared between REGY and GY. ND means no data
