# Supplementary material for: Yak rumen microbial diversity at different forage growth stages of an alpine meadow on the Qinghai-Tibet Plateau
Source: PeerJ. 2019 Sep 19;7:e7645. doi: 10.7717/peerj.7645 (PMC6754979; doi:10.7717/peerj.7645)
Supplement: Table S3 — Taxa with a relative abundance of ≥1% in at least one sample were analyzed, the P-value stands significant difference in groups by Kruskal–Wallis test with p-values <0.05. [file peerj-07-7645-s011.xlsx]

## Sheet: Table S3 
Table S3 The relative abundance on different forage grass stage at phylm,family and genus level
Taxonomic groups			Group			p -value
phylum	family	genus	REGY	GY	WGY
Bacteroidetes			52.8756	49.6025	52.989	0.23
	Prevotellaceae		24.7558	21.3727	26.09	0.11
		Prevotellaceae_UCG-003	2.98973	1.85799	2.94003	p< 0.01
		Prevotellaceae_UCG-001	2.58923	1.9878	3.11155	0.015
		Prevotella_1	15.8892	14.3773	17.0273	0.138337
	Rikenellaceae		11.5936	11.4401	11.9649	0.729907
		Rikenellaceae_RC9_gut_group	11.1541	10.8499	11.5104	0.703099
	Bacteroidales_BS11_gut_group		9.85165	9.09717	7.38928	0.16339
	Bacteroidales_S24-7_group		2.64271	5.00395	2.67289	0.0144635
	Bacteroidales_RF16_group		1.32705	1.17037	1.68926	0.160673
Firmicutes			33.8867	40.4241	27.9306	p< 0.01
	Ruminococcaceae		14.1878	16.5038	13.5573	0.0145383
		Ruminococcaceae_UCG-010	1.30368	1.91848	1.84178	0.00632512
		Ruminococcaceae_UCG-005	1.3614	2.6196	0.98446	p< 0.01
		Ruminococcaceae_UCG-014	1.96935	1.7579	1.22364	p< 0.01
		Ruminococcaceae_NK4A214_group	1.28901	2.54788	1.01912	p< 0.01
		Ruminococcus_1	0.66701	1.53642	1.17255	p< 0.01
		Papillibacter	1.34913	0.91434	1.04688	0.131039
		Saccharofermentans	0.51484	0.92204	0.90134	p< 0.01
	Lachnospiraceae		12.6238	12.062	8.50182	p< 0.01
		Butyrivibrio_2	1.98932	3.36396	1.24572	p< 0.01
		Pseudobutyrivibrio	1.6897	0.45713	0.15336	p< 0.01
	Christensenellaceae		2.85975	4.946	1.97384	p< 0.01
		Christensenellaceae_R-7_group	2.7141	4.51789	1.9138	p< 0.01
	Veillonellaceae		1.58479	3.12491	0.45107	p< 0.01
		Selenomonas_1	2.39271	1.22065	0.14941	p< 0.01
	Family_XIII		0.7388	1.24402	0.69121	p< 0.01
Lentisphaerae			0.64017	0.15926	2.39652	p< 0.01
Verrucomicrobia			6.08934	3.33358	8.48407	p< 0.01
Proteobacteria			1.51163	2.04537	2.20062	0.00514527
Spirochaetae			1.02213	1.21391	1.12311	0.489903
		Treponema_2	0.78515	0.5882	0.70076	0.363632
Tenericutes			0.91308	0.95324	0.93143	0.732738
SR1			1.03363	0.7956	0.94101	0.298486
Cyanobacteria			0.66437	0.46406	0.73107	0.431711
Fibrobacteres			0.3874	0.17726	0.48244	p< 0.01
other			0.87609	0.752	1.6491
Unclassified			0.09966	0.07902	0.14098
	other		6.20443	6.64149	10.5373
	Unclassified		11.6296	7.39342	14.481
		other	8.77006	18.2982	14.0283
		Unclassifed	36.9112	31.614	37.5853
REGY: regreen grass stage; GY:grassy grass stage; WGY:withered grass stage
