# Supplementary material for: Yak rumen microbial diversity at different forage growth stages of an alpine meadow on the Qinghai-Tibet Plateau
Source: PeerJ. 2019 Sep 19;7:e7645. doi: 10.7717/peerj.7645 (PMC6754979; doi:10.7717/peerj.7645)
Supplement: Table S4 — The correlation coefficient is shown as follows. The plus sign means that there has a positive correlation between bacteria at genera level and forage nutrient, the minus sign means that there has negative correlation between bacteria at genera level and forage nutrient. Red indicates that the correlation coefficients (r) were > 0.4 and the p-values were < 0.05, blue indicates that the correlation coefficients (r) were < − 0.4 and the P-values were ¡0.05. [file peerj-07-7645-s012.xlsx]

## Sheet: TableS4
Table S4 Correlation coefficient between the relative abundances of bacteria (genera )and forage nutrient composition parameters
Genus	Correlation coefficient
	CP	EE	ADF	NDF	Ca	P
Prevotella_1	-0.28364	-0.0338408	0.325545	-0.0130397	-0.386488	-0.124599
Rikenellaceae_RC9_gut_group	-0.163513	-0.0411349	0.0489078	-0.188251	-0.0609881	-0.0187412
Christensenellaceae_R-7_group	0.446451	0.281854	-0.160655	0.108252	0.526995	0.417712
Prevotellaceae_UCG-003	-0.32391	-0.493721	0.282875	-0.528252	-0.694058	-0.170662
Prevotellaceae_UCG-001	-0.328463	-0.156242	0.0710581	-0.0656324	-0.418798	-0.32768
Butyrivibrio_2	0.548388	0.230118	-0.333859	0.230083	0.585193	0.429164
Ruminococcaceae_UCG-010	-0.232892	0.478201	-0.125692	0.410314	0.40707	-0.242285
Ruminococcaceae_UCG-005	0.56511	0.349445	-0.271104	0.310537	0.806109	0.483338
Ruminococcaceae_UCG-014	0.563117	-0.412449	0.0788988	-0.455654	0.170951	0.6302
Ruminococcaceae_NK4A214_group	0.484624	0.406808	-0.141247	0.249361	0.776395	0.439242
coprostanoligenes_group	-0.429333	0.0237472	-0.0611285	0.0190724	-0.249076	-0.419407
Selenomonas_1	0.547173	0.120198	0.0257966	0.192873	0.552118	0.435667
Ruminococcus_1	0.0622458	-0.639101	-0.349419	-0.577063	-0.535839	0.0895589
Papillibacter	0.0444838	0.298675	-0.225103	0.23453	0.368748	0.0529165
Saccharofermentans	-0.30753	-0.475116	0.0549097	-0.521198	-0.613659	-0.144134
Pseudobutyrivibrio	0.516924	0.367503	-0.203748	0.346692	0.722481	0.421287
Treponema_2	0.00777703	0.1524	-0.227654	0.242695	0.394897	0.0231329
Erysipelotrichaceae_UCG-004	-0.11812	0.394721	-0.000764085	0.352781	0.394314	-0.164127
Anaerovorax	0.296698	0.31994	-0.197496	0.179551	0.580657	0.233766
Succiniclasticum	-0.1053	0.401198	-0.0489124	0.369258	0.34545	-0.0499597
Correlations analyses between the relative abundances of bacteria genera and forage nutrient composition parameters. Pearson correlations analyse using the pheatmap package, the resulting numerical matrix is visually displayed in a heatmap diagram. The colour depth indicates the size of the data value (correlation value). Red indicates that the correlation coefficients (r) were >0.4 and the p- va…
