# Supplementary material for: Yak rumen microbial diversity at different forage growth stages of an alpine meadow on the Qinghai-Tibet Plateau
Source: PeerJ. 2019 Sep 19;7:e7645. doi: 10.7717/peerj.7645 (PMC6754979; doi:10.7717/peerj.7645)
Supplement: Table S5 — The relative average abundance of KOs in KEGG pathway at level 3 were showed in the following tables. KOs in KEGG pathway at level 2 and KEGG pathway at level 1 were also listed in the following. The P-value stands significant difference in groups by Kruskal–Wallis test with p-values <0.05 at three stages. The five with higher relative abundance KOs were marked in red. [file peerj-07-7645-s013.xlsx]

## Sheet: TableS5
Table S5 Relative abundance of predicted functions. The relative average abundance of KOs in KEGG level3 are showed in the following tables. KOs in KEGG level 2 and KEGG level 1 are also listed belows.
Level_3	level 2	level 1	REGY	GY	WGY	average	p-value
Cell cycle - Caulobacter	Cell Growth and Death	Cellular Processes	1.74699	1.70038	1.78093	1.74276	p<0.01
Bacterial chemotaxis	Cell Motility	Cellular Processes	1.42367	1.27971	1.32014	1.34117	P=0.019
ABC transporters	Membrane Transport	Environmental Information Processing	7.138	7.581	6.824	9.03593	p<0.01
Bacterial secretion system	Membrane Transport	Environmental Information Processing	1.21629	1.23704	1.38812	1.28048	p<0.01
Ribosome	Translation	Genetic Information Processing	2.27247	2.30562	2.37081	2.3163	P=0.019
Aminoacyl-tRNA biosynthesis	Translation	Genetic Information Processing	3.60303	3.61911	3.7619	3.66135	P=0.031
Homologous recombination	Replication and Repair	Genetic Information Processing	1.67277	1.72917	1.63893	1.68029	P=0.023
Mismatch repair	Replication and Repair	Genetic Information Processing	1.41213	1.37442	1.37166	1.38607	P=0.019
RNA degradation	Folding, Sorting and Degradation	Genetic Information Processing	1.18774	1.25645	1.24734	1.23051	p<0.01
Starch and sucrose metabolism	Carbohydrate Metabolism	Metabolism	2.86834	2.58164	2.52851	2.65949	p<0.01
Amino sugar and nucleotide sugar metabolism	Carbohydrate Metabolism	Metabolism	2.28493	2.19917	2.19082	2.22497	p<0.01
Fructose and mannose metabolism	Carbohydrate Metabolism	Metabolism	1.52623	1.45867	1.44128	1.47539	p<0.01
Porphyrin and chlorophyll metabolism	Metabolism of Cofactors and Vitamins	Metabolism	1.62559	1.98484	1.55225	1.72089	p<0.01
Nitrogen metabolism	Energy Metabolism	Metabolism	1.69912	1.66979	1.76542	1.71144	p<0.01
Oxidative phosphorylation	Energy Metabolism	Metabolism	1.63857	1.72775	1.73024	1.69885	p<0.01
Peptidoglycan biosynthesis	Glycan Biosynthesis and Metabolism	Metabolism	1.85217	1.76464	1.83198	1.81626	P=0.031
Alanine, aspartate and glutamate metabolism	Amino Acid Metabolism	Metabolism	1.40384	1.4251	1.35794	1.39563	p<0.01
Cysteine and methionine metabolism	Amino Acid Metabolism	Metabolism	1.36496	1.39256	1.31223	1.35658	p<0.01
Glycine, serine and threonine metabolism	Amino Acid Metabolism	Metabolism	1.27983	1.29441	1.42072	1.33165	p<0.01
Phenylalanine, tyrosine and tryptophan biosynthesis	Amino Acid Metabolism	Metabolism	1.18601	1.2837	1.11882	1.19618	p<0.01
Lysine biosynthesis	Amino Acid Metabolism	Metabolism	1.10887	1.10838	1.1471	1.12145	p<0.01
Histidine metabolism	Amino Acid Metabolism	Metabolism	0.961672	1.00591	0.946856	0.971478	p<0.01
Arginine and proline metabolism	Amino Acid Metabolism	Metabolism	2.00824	2.08162	1.96004	2.01663	P=0.017
REGY: regreen grass stage; GY:grassy grass stage; WGY:withered grass stage
